# Supplementary material
Source: MDPI journal article supplement (https://www.mdpi.com/1424-2818/15/4/578)
Supplement: s1 [file s1]

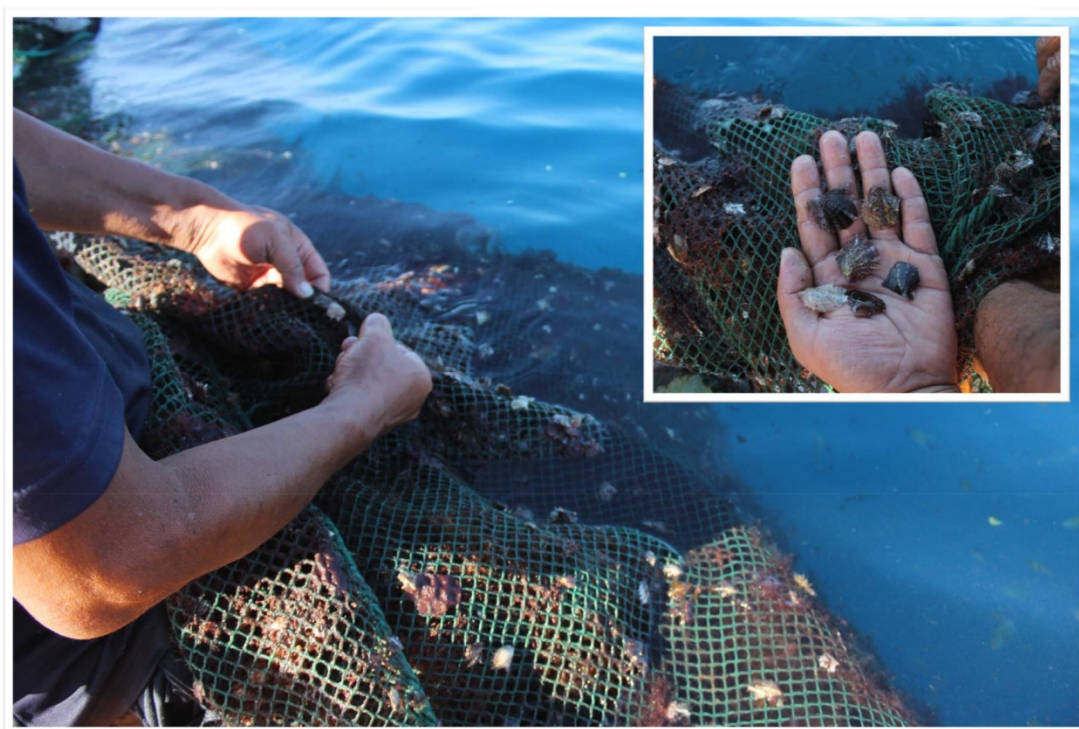

Figure S1. The occurrence of *Pinctada fucata* in Mischief Reef.

Table S1. Information of the downloaded ITS2 sequences from NCBI.

| Sample Site | GenBank Accession no. |
|-------------|-----------------------|
| Beibu Bay   | AY877583.1            |
| Beibu Bay   | AY877590.1            |
| Beibu Bay   | AY877594.1            |
| Beibu Bay   | AY877595.1            |
| Beibu Bay   | AY877598.1            |
| Beibu Bay   | AY877601.1            |
| Beibu Bay   | AY877604.1            |
| Daya Bay    | AY877581.1            |
| Daya Bay    | AY877584.1            |
| Daya Bay    | AY877585.1            |
| Daya Bay    | AY877586.1            |
| Daya Bay    | AY877589.1            |
| Daya Bay    | AY877600.1            |
| Daya Bay    | AY877602.1            |
| Daya Bay    | AY877603.1            |
| Sanya Bay   | AY877582.1            |
| Sanya Bay   | AY877587.1            |
| Sanya Bay   | AY877588.1            |
| Sanya Bay   | AY877591.1            |
| Sanya Bay   | AY877592.1            |
| Sanya Bay   | AY877593.1            |
| Sanya Bay   | AY877596.1            |
| Sanya Bay   | AY877597.1            |
| Sanya Bay   | AY877599.1            |
| Sanya Bay   | AY877605.1            |

The downloaded sequences were first reported in study of Yu and Zhu (2006) (Yu DH; Zhu JH. Species status of Chinese *Pinctada fucata*, Japanese *P. fucata martensii* and Australian *P. imbricata* using ITS and AFLP markers. South China Fisheries Science 2006, 2(5): 36-44)

Table S2 Haplotypes of the four *P. fucata* populations

| Population | Zhanjiang | Lingshui | Mischief | Haiphong |
|------------|-----------|----------|----------|----------|
| Hap_1      | 0         | 1        | 0        | 0        |
| Hap_2      | 0         | 0        | 0        | 1        |
| Hap_3      | 1         | 0        | 0        | 2        |
| Hap_4      | 0         | 0        | 1        | 0        |
| Hap_5      | 1         | 0        | 0        | 1        |
| Hap_6      | 0         | 1        | 1        | 1        |
| Hap_7      | 3         | 1        | 0        | 0        |
| Hap_8      | 0         | 1        | 1        | 0        |
| Hap_9      | 1         | 0        | 0        | 0        |
| Hap_10     | 0         | 0        | 1        | 0        |
| Hap_11     | 0         | 1        | 0        | 0        |
| Hap_12     | 0         | 1        | 0        | 0        |
| Hap_13     | 0         | 0        | 1        | 0        |
| Hap_14     | 0         | 0        | 1        | 0        |
| Hap_15     | 0         | 0        | 0        | 1        |
| Hap_16     | 0         | 0        | 0        | 1        |
| Hap_17     | 1         | 0        | 0        | 0        |
| Hap_18     | 1         | 0        | 0        | 0        |
| Hap_19     | 0         | 1        | 0        | 0        |
| Hap_20     | 0         | 0        | 1        | 0        |
| Hap_21     | 0         | 1        | 0        | 0        |
| Hap_22     | 1         | 0        | 0        | 0        |
| Hap_23     | 0         | 0        | 0        | 1        |
| Hap_24     | 0         | 0        | 0        | 1        |
| Hap_25     | 0         | 0        | 0        | 1        |
| Hap_26     | 1         | 0        | 0        | 0        |
| Hap_27     | 0         | 1        | 0        | 0        |
| Hap_28     | 0         | 0        | 1        | 0        |
| Hap_29     | 0         | 0        | 1        | 0        |
| Hap_30     | 0         | 0        | 1        | 0        |
| Hap_31     | 0         | 1        | 0        | 0        |
